RESEARCH ARTICLE

# Development of a Prediction Rule for Estimating Postoperative Pulmonary Complications

Byeong-Ho Jeong<sup>1,9</sup>, Beomsu Shin<sup>1,9</sup>, Jung Seop Eom<sup>2</sup>, Hongseok Yoo<sup>1</sup>, Wonjun Song<sup>1</sup>, Sangbin Han<sup>3</sup>, Kyung Jong Lee<sup>1</sup>, Kyeongman Jeon<sup>1</sup>, Sang-Won Um<sup>1</sup>, Won-Jung Koh<sup>1</sup>, Gee Young Suh<sup>1</sup>, Man Pyo Chung<sup>1</sup>, Hojoong Kim<sup>1</sup>, O. Jung Kwon<sup>1</sup>, Sookyong Woo<sup>4</sup>, Hye Yun Park<sup>1\*</sup>

1. Division of Pulmonary and Critical Care Medicine, Department of Medicine, Samsung Medical Center, Sungkyunkwan University School of Medicine, Gangnam-gu, Seoul, Republic of Korea, 2. Department of Internal Medicine, Pusan National University College of Medicine, Pusan, Republic of Korea, 3. Department of Anesthesiology and Pain Medicine, Samsung Medical Center, Sungkyunkwan University School of Medicine, Gangnam-gu, Seoul, Republic of Korea, 4. Biostatistics Team, Samsung Biomedical Research Institute, Gangnam-gu, Seoul, Republic of Korea

\*[hyeyunpark@skku.edu](mailto:hyeyunpark@skku.edu)

These authors contributed equally to this work.

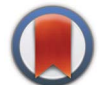

CrossMark  
click for updates

 OPEN ACCESS

**Citation:** Jeong B-H, Shin B, Eom JS, Yoo H, Song W, et al. (2014) Development of a Prediction Rule for Estimating Postoperative Pulmonary Complications. PLoS ONE 9(12): e113656. doi:10.1371/journal.pone.0113656

**Editor:** Peter Rosenberger, University of Tübingen, Germany

**Received:** April 17, 2014

**Accepted:** October 30, 2014

**Published:** December 1, 2014

**Copyright:** © 2014 Jeong et al. This is an open-access article distributed under the terms of the [Creative Commons Attribution License](https://creativecommons.org/licenses/by/4.0/), which permits unrestricted use, distribution, and reproduction in any medium, provided the original author and source are credited.

**Data Availability:** The authors confirm that all data underlying the findings are fully available without restriction. All relevant data are within the paper and its Supporting Information files.

**Funding:** This study was supported by Samsung Medical Center Foundation (SMO1140211). The funders had no role in study design, data collection and analysis, decision to publish, or preparation of the manuscript.

**Competing Interests:** The authors have declared that no competing interests exist.

## Abstract

Patient- and procedure-related factors associated with postoperative pulmonary complications (PPCs) have changed over the last decade. Therefore, we sought to identify independent risk factors of PPCs and to develop a clinically applicable scoring system. We retrospectively analyzed clinical data from 2,059 patients who received preoperative evaluations from respiratory physicians between June 2011 and October 2012. A new scoring system for estimating PPCs was developed using beta coefficients of the final multiple regression models. Of the 2,059 patients studied, 140 (6.8%) had PPCs. A multiple logistic regression model revealed seven independent risk factors (with scores in parentheses): age  $\geq 70$  years (2 points), current smoker (1 point), the presence of airflow limitation (1 point), American Society of Anesthesiologists class  $\geq 2$  (1 point), serum albumin  $< 4$  g/dL (1 point), emergency surgery (2 points), and non-laparoscopic abdominal/cardiac/aortic aneurysm repair surgery (4 points). The area under the curve was 0.79 (95% CI, 0.75–0.83) with the newly developed model. The new risk stratification including laparoscopic surgery has a good discriminative ability for estimating PPCs in our study cohort. Further research is needed to validate this new prediction rule.

## Introduction

Postoperative pulmonary complications (PPCs) are one of the most common perioperative adverse events in patients undergoing surgery and contribute to significant increases in morbidity, mortality, and length of postoperative hospital stay [1]. Although the incidence of PPCs (2–19%) is at least as common as cardiac complications (2.5%) following non-cardiac surgery [2–4], the protocol on perioperative pulmonary assessment is much less robust than that for cardiovascular risk assessment.

Based on the American College of Physicians (ACP) guidelines for preventing PPCs in patients undergoing non-cardiothoracic surgery [5, 6], two main categories of risks are associated with the development of PPCs: patient-related and procedure-related risk factors. Despite these established factors, there are still various variables that should be evaluated perioperatively. Moreover, the patient- and procedure-related factors associated with PPCs have changed over the last decade. For example, progressive developments in anesthetic techniques and minimally invasive surgery have contributed to a reduction in PPCs, and improved nutritive conditions of patients have influenced the age of patients who were previously considered to be at unacceptably high surgical risk. With current trends, respiratory physicians are increasingly asked to evaluate PPCs risk, particularly in patients with any problems of the respiratory system or advanced age. Therefore, our goals were to identify independent risk factors of PPCs in the current clinical setting and to develop a clinically applicable scoring system.

## Methods

### Design

This retrospective, single-center, observational study with prospectively collected data was conducted at Samsung Medical Center (a 1960-bed, university-affiliated, tertiary referral hospital in Seoul, South Korea) between June 2011 and October 2012. The study was approved by the Institutional Review Board of Samsung Medical Center to review and publish information obtained from patient records. Informed consent was waived because of the retrospective nature of the study and patient data was deidentified prior to data access and analysis.

### Patients and data collection

Over the study period, all consecutive patients consulting respiratory physicians to evaluate the risk of PPCs before surgery were included, and the PPC-related variables of each patient were registered prospectively. The patients were not included in this study with 1) aged younger than 18 years; 2) pulmonary related surgery; and 3) obstetric surgery or any procedure during pregnancy and the patients with organ transplantation were excluded.

Data collection was performed prospectively by respiratory physicians at the time of consultation about the risk of PPCs. The following information was

collected: data related to the patient (age, gender, body mass index (BMI), smoking status, alcohol habits, airflow limitation, comorbidities such as congestive heart failure (CHF), mental status, American Society of Anesthesiologists (ASA) physical status classification, serum albumin, serum hemoglobin, and chest radiograph findings) and the surgical operation (type of anesthesia, elective or emergency surgery, and surgical site and specialty), which are identified in the ACP guidelines as PPC-related variables in patients undergoing non-cardiothoracic surgery. The presence of airflow limitation was defined as the ratio of forced expiratory volume in 1 s to forced vital capacity ( $FEV_1/FVC$ )  $<0.7$  and  $FEV_1 <80\%$  of predicted value.

The main outcome, PPCs, consisted of in-hospital postoperative events related to the respiratory system, such as respiratory infection, respiratory failure, pleural effusion, atelectasis, pneumothorax, and bronchospasm within the first 7 postoperative days. The details of the definitions of PPCs have been published elsewhere [7].

### Perioperative prevention strategy

During the perioperative period, a lung-expansion maneuver with incentive spirometry was performed in all patients who underwent general anesthesia surgery [8] and deep inspiration, active coughing, and sputum expectoration were encouraged after surgery. Smokers were recommended to quit smoking for at least 2 weeks before surgery. Patients with asthma were treated according to the asthma guidelines [9].

### Statistical analysis

Data are presented as means  $\pm$  standard deviation or medians (interquartile ranges) for continuous variables and as numbers (percentages) for categorical variables. Some continuous variables, such as age, ASA physical status, and serum albumin, were coded as dummy variables using cut-off points based on the highest Youden's index ( $[\text{sensitivity} + \text{specificity}] - 1$ ) [8] for predicting PPCs and the other continuous variables (BMI and serum hemoglobin) were coded as dummy variables using published threshold values (see Table S1) [7, 10]. Based on the odds ratio and p-value of the initial multivariable logistic regression, the surgical specialty in Table 1 was re-categorized as follows: cardiac/aortic aneurysm repair/abdominal open surgery, laparoscopic abdominal, neurosurgery, and other. To identify risk factors independently associated with the occurrence of PPCs, we conducted a multivariable analysis using a logistic regression model with backward step-wise selection with  $p < 0.05$  for inclusion of variables and  $p > 0.10$  for removal of variables. Variables were assessed for collinearity and goodness-of-fit of the model was evaluated with the Hosmer–Lemeshow test. Initial candidate variables for multivariable analysis were all of the variables we collected prospectively, regardless of p value in the univariate analyses.

**Table 1.** Baseline characteristics (n=2,059).

|                                                               | Mean ± SD or number (%) |
|---------------------------------------------------------------|-------------------------|
| Age, year                                                     | 67 ± 11                 |
| Sex, male                                                     | 1288 (62.6)             |
| Body mass index, kg/m <sup>2</sup>                            | 23.7 ± 3.5              |
| Current smoker within 2 months                                | 300 (14.6)              |
| Alcoholics                                                    | 77 (3.7)                |
| Comorbidities                                                 |                         |
| Malignancy                                                    | 844 (41.0)              |
| CHF                                                           | 85 (4.1)                |
| General status                                                |                         |
| Confused mentality                                            | 35 (1.7)                |
| Recent loss of body weight                                    | 76 (3.7)                |
| ASA physical status classification                            | 1.7 ± 0.6               |
| 1                                                             | 749 (36.4)              |
| 2                                                             | 1129 (54.8)             |
| 3                                                             | 166 (8.1)               |
| 4                                                             | 13 (0.6)                |
| 5                                                             | 2 (0.1)                 |
| Pulmonary Function Test, Laboratory and radiographic findings |                         |
| Airflow limitation                                            | 613 (29.8)              |
| Serum albumin, g/dl                                           | 4.1 ± 0.5               |
| Serum hemoglobin, g/dl                                        | 13.0 ± 1.9              |
| Active lesion on chest radiography                            | 210 (10.2)              |
| Type of anesthesia                                            |                         |
| General                                                       | 1769 (85.9)             |
| Spinal                                                        | 230 (11.2)              |
| Combined spinal and epidural                                  | 46 (2.2)                |
| Monitored anesthesia care                                     | 14 (0.7)                |
| Emergency surgery                                             | 84 (4.1)                |
| Surgical specialty                                            |                         |
| Abdominal                                                     | 643 (31.2)              |
| Upper abdominal                                               | 254 (12.3)              |
| Lower abdominal                                               | 158 (7.7)               |
| Laparoscopic abdominal                                        | 231 (11.2)              |
| Orthopedic and spinal                                         | 418 (20.3)              |
| Neurosurgery                                                  | 323 (15.7)              |
| Gynecologic and urologic                                      | 294 (14.3)              |
| Head and neck                                                 | 120 (5.8)               |
| Cardiac surgery                                               | 63 (3.1)                |
| Vascular                                                      | 56 (2.7)                |
| Aortic aneurysm repair                                        | 29 (1.4)                |
| Others*                                                       | 113 (5.5)               |

\*included 49 endocrine, 35 eye and plastic, and 29 breast surgery.

SD, standard deviation; CHF, congestive heart failure; ASA, American Society of Anesthesiologists.

doi:10.1371/journal.pone.0113656.t001

From the multiple logistic regression model findings, a score-based predictive scoring system was developed. We assigned scores according to dividing beta coefficients by the absolute value of the smallest coefficient in the final model and rounding up to the nearest integer to generate a simple integer-based point score for each predictor variable [11]. The total score for each patient was calculated by adding each component together. Using a receiver operating characteristic (ROC) curve, we explored the predictive value of the newly developed scoring system for the occurrence of PPCs, and internally validated the rule using the bootstrap method in the original dataset by sampling with replacement for 1,000 iterations.

All tests were two-sided, and a p-value of less than 0.05 was considered to indicate statistical significance. Statistical analyses were performed using the SPSS software (IBM SPSS Statistics ver. 21, Chicago, IL) and STATA 12 (STATA, College, Texas, USA) for ROC analysis.

## Results

### Patient characteristics

During the study period, 2,338 consecutive patients had respiratory consultations to evaluate the risk of PPCs (Fig. 1). Of these, 189 patients whose surgery was canceled, 16 who underwent organ transplantation, and 74 who had a consultation with a respiratory physician but variables were not registered were excluded. Consequently, 2,059 patients were eligible for this study.

Their baseline characteristics are presented in Table 1. The mean age of the patients was 67 years and 62.6% were males. In total, 844 (41.0%) patients had malignancies and 85 (4.1%) had CHF. Most patients were classified in ASA classes 1 (36.4%) and 2 (54.8%) and 613 (29.8%) had airflow limitation. The most frequent types of surgery were abdominal surgery (31.2%) and orthopedic and spinal surgery (20.3%). Of the 643 abdominal surgeries, 231 (35.9%) patients underwent laparoscopic surgery.

### Clinical outcome

The prevalence and number of PPCs according to each type of surgery is presented in Table 2. In total, 183 PPCs were recorded in 140 (6.8%) patients. The most common PPCs were respiratory failure (3.4%), pleural effusion (1.8%), atelectasis (1.7%), and respiratory infection (1.6%). The mean duration of anesthesia was  $3.5 \pm 2.0$  h and the median length of hospital stay was 10 (6–15) days in all patients.

### Predictors of PPC and the new scoring system

A multivariable logistic regression model for evaluating risk factors of the occurrence of PPCs is shown in Table 3. The multivariable logistic regression model selected seven independent predictors of PPCs: age  $\geq 70$  years (odds ratio (OR) 2.03; 95% confidence interval (CI) 1.37–3.00;  $p < 0.001$ ), current smoker

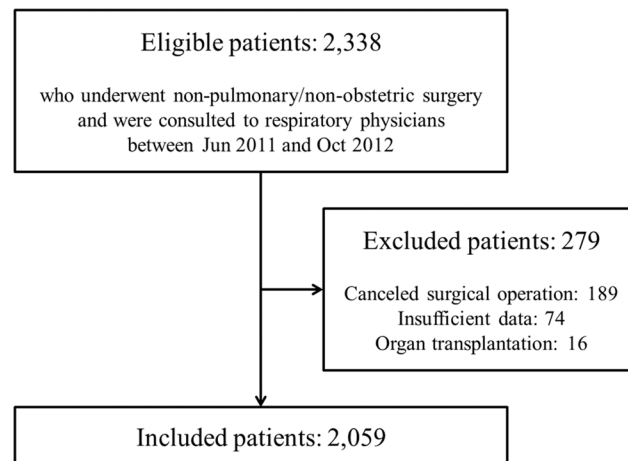

**Figure 1. Recruitment flow chart.**

doi:10.1371/journal.pone.0113656.g001

within 2 months (OR 1.62; 95% CI 1.03–2.54;  $p=0.036$ ), ASA class  $\geq 2$  (OR 1.59; 95% CI 1.01–2.52;  $p=0.046$ ), airflow limitation (OR 1.75; 95% CI 1.18–2.58;  $p=0.005$ ), serum albumin  $<4.0$  g/dL (OR 1.49; 95% CI 1.00–2.21;  $p=0.049$ ), emergency surgery (OR 2.16; 95% CI 1.00–4.65;  $p=0.050$ ), and cardiac/aortic

**Table 2.** Prevalence of postoperative pulmonary complications according to each type of surgery.

|                          | Patients | Respiratory failure | Pleural effusion | Atelectasis | Pneumonia | Bronchospasm | Pneumothorax | Number of occurred PPCs | Number of patients who occurred PPCs |
|--------------------------|----------|---------------------|------------------|-------------|-----------|--------------|--------------|-------------------------|--------------------------------------|
| Abdominal*               | 643      | 36                  | 29               | 27          | 17        | 1            | 0            | 110                     | 82                                   |
| Upper abdominal          | 254      | 16                  | 21               | 15          | 6         | 0            | 0            | 58                      | 48                                   |
| Lower abdominal          | 158      | 15                  | 7                | 6           | 7         | 1            | 0            | 36                      | 22                                   |
| Laparoscopic abdominal   | 231      | 5                   | 1                | 6           | 4         | 0            | 0            | 16                      | 12                                   |
| Orthopedic and spinal    | 418      | 15                  | 1                | 1           | 8         | 2            | 0            | 27                      | 23                                   |
| Neurosurgery             | 323      | 4                   | 1                | 0           | 5         | 0            | 0            | 10                      | 7                                    |
| Gynecologic and urologic | 294      | 4                   | 1                | 0           | 2         | 0            | 0            | 7                       | 5                                    |
| Head and neck            | 120      | 0                   | 0                | 0           | 0         | 0            | 0            | 0                       | 0                                    |
| Cardiac                  | 63       | 4                   | 2                | 1           | 1         | 1            | 1            | 10                      | 9                                    |
| Vascular                 | 56       | 3                   | 1                | 0           | 0         | 0            | 0            | 4                       | 4                                    |
| Aortic aneurysm repair   | 29       | 5                   | 3                | 6           | 0         | 1            | 0            | 15                      | 10                                   |
| Others                   | 113      | 0                   | 0                | 0           | 0         | 0            | 0            | 0                       | 0                                    |
| Total                    | 2059     | 71                  | 38               | 35          | 33        | 5            | 1            | 183                     | 140                                  |

\*included upper abdominal, lower abdominal, and laparoscopic abdominal surgery.  
 PPC, postoperative pulmonary complications.  
 Cases are duplicated.

doi:10.1371/journal.pone.0113656.t002

aneurysm repair/abdominal open surgery (OR 7.02; 95% CI 4.04–12.19;  $p < 0.001$ ).

Of these seven predictors, the lowest logistic coefficient was 0.398 for serum albumin  $< 4.0$  g/dL. On the basis of this value, we developed a new scoring system to predict the occurrence of PPCs, composed of age  $\geq 70$  years (2 points), current smoker within 2 months (1 point), ASA class  $\geq 2$  (1 point), the presence of airflow limitation (1 point), serum albumin  $< 4.0$  g/dL (1 point), emergency surgery (2 points), and cardiac/aortic aneurysm repair/abdominal open surgery (non-laparoscopic) surgery (4 points), resulting in a maximum of 12 possible points. The new predictive scoring system had a high discriminatory power to predict the occurrence of PPCs with an area under the curve (AUC) of 0.79 (95% CI 0.75–0.83), which was similar to 0.79 (95% CI 0.75–0.82) for the average AUC obtained from an internal validation. Moreover, the AUC of this scoring system was significantly higher than the AUC of 0.65 (0.61–0.69) from predictive scoring summed simply as 1 point for each variable (maximum of 7 possible points) ( $p < 0.001$ ).

[Figure 2](#) shows the incidence of PPCs and the number of patients by each point ([Fig. 2A](#)) and each class ([Fig. 2B](#)) of the scoring system. Each point increment was associated with a 1.6-fold (OR 1.56; 95% CI 1.45–1.68,  $p < 0.001$ ) increase in the odds for the occurrence of PPCs. When patients were grouped into low- (0–3 points), intermediate- (4–6 points), high- (7–9 points), and very high-risk ( $\geq 10$  points) strata as a function of the overall point score, the occurrence of PPCs was associated with a 3.8-fold (OR 3.80; 95% CI 3.04–4.77;  $p < 0.001$ ) increment by each class increment.

## Discussion

This study evaluated risk factors for the occurrence of PPCs among more than 2,000 patients who underwent surgery with general or neuraxial anesthesia and the overall incidence of PPCs was 6.8%. Using multivariable logistic regression models, we found seven independent predictors of PPCs: age  $\geq 70$  years, current smoker within 2 months, ASA class  $\geq 2$ , the presence of airflow limitation, serum albumin  $< 4.0$  g/dL, emergency surgery, and cardiac/aortic aneurysm repair/abdominal open surgery. When each independent variable was endowed with a weighted score based on logistic coefficients, cardiac/aortic aneurysm repair/abdominal open surgery was the most predictive variable with 4 points, followed by age  $\geq 70$  years and emergency surgery with 2 points each. Compared with the predictive scoring system based on simply scoring 1 point for each variable, this weighted risk score strategy had a significantly better discriminative power for estimating PPCs.

Using the variables listed in the ACP guidelines, we derived new cut-off values for each variable using our cohort. The newly determined cut-off values from our cohort were 70 years of age, class 2 of ASA physical status, and 4.0 mg/dL for albumin. While advanced age and limited physical status were similar to the



**Table 3.** Results of logistic regression model to predict postoperative pulmonary complications (PPC) and assigned points based on regression coefficient to develop the PPC scoring index.

| Variables                                             | Univariable analysis |                      |                   |        | Multivariable analysis |                   |        |                 |
|-------------------------------------------------------|----------------------|----------------------|-------------------|--------|------------------------|-------------------|--------|-----------------|
|                                                       | With PPC (n=140)     | Without PPC (n=1919) | OR (95% CI)       | p      | Regression coefficient | OR (95% CI)       | p      | Assigned points |
| Age ≥70 yr                                            | 82 (59)              | 822 (43)             | 1.89 (1.33–2.67)  | <0.001 | 0.708                  | 2.03 (1.37–3.00)  | <0.001 | 2               |
| Sex, male                                             | 102 (73)             | 1186 (62)            | 1.66 (1.13–2.44)  | 0.010  |                        |                   |        |                 |
| Body mass index                                       |                      |                      |                   |        |                        |                   |        |                 |
| <18.5 kg/m <sup>2</sup>                               | 12 (9)               | 114 (6)              | 1.40 (0.68–2.89)  | 0.594  |                        |                   |        |                 |
| 18.5–25.0 kg/m <sup>2</sup>                           | 87 (62)              | 1158 (60)            | 1.00              | Ref    |                        |                   |        |                 |
| >25.0 kg/m <sup>2</sup>                               | 41 (29)              | 647 (34)             | 0.84 (0.54–1.31)  | 0.768  |                        |                   |        |                 |
| Current smoker within 2 months                        | 33 (24)              | 267 (14)             | 1.91 (1.27–2.88)  | 0.002  | 0.482                  | 1.62 (1.03–2.54)  | 0.036  | 1               |
| Alcoholics                                            | 4 (3)                | 73 (4)               | 0.75 (0.27–2.08)  | 0.580  |                        |                   |        |                 |
| Malignancy                                            | 78 (56)              | 766 (40)             | 1.89 (1.34–2.68)  | <0.001 |                        |                   |        |                 |
| CHF                                                   | 7 (5)                | 78 (4)               | 1.24 (0.56–2.75)  | 0.592  |                        |                   |        |                 |
| Confused mentality                                    | 2 (1)                | 33 (2)               | 0.83 (0.20–3.49)  | 0.797  |                        |                   |        |                 |
| Recent loss of body weight                            | 11 (8)               | 65 (3)               | 2.44 (1.26–4.73)  | 0.009  |                        |                   |        |                 |
| ASA physical status ≥ class 2                         | 109 (78)             | 1201 (63)            | 2.10 (1.40–3.17)  | <0.001 | 0.466                  | 1.59 (1.01–2.52)  | 0.046  | 1               |
| Presence of airflow limitation                        | 68 (49)              | 545 (28)             | 2.38 (1.69–3.37)  | <0.001 | 0.558                  | 1.75 (1.18–2.58)  | 0.005  | 1               |
| Serum albumin <4.0 g/dl                               | 61 (44)              | 547 (29)             | 1.95 (1.37–2.77)  | <0.001 | 0.398                  | 1.49 (1.00–2.21)  | 0.049  | 1               |
| Serum hemoglobin <10 g/dl                             | 16 (11)              | 129 (7)              | 1.79 (1.03–3.10)  | 0.039  |                        |                   |        |                 |
| Active lesion on chest radiography                    | 18 (13)              | 192 (10)             | 1.33 (0.79–2.22)  | 0.284  |                        |                   |        |                 |
| General anesthesia                                    | 129 (92)             | 1640 (85)            | 2.00 (1.06–3.74)  | 0.031  |                        |                   |        |                 |
| Emergency surgery                                     | 10 (7)               | 74 (4)               | 1.92 (0.97–3.80)  | 0.062  | 0.768                  | 2.16 (1.00–4.65)  | 0.050  | 2               |
| Surgical specialty                                    |                      |                      |                   |        |                        |                   |        |                 |
| Others                                                | 32 (23)              | 969 (50)             | 1.00              | Ref    |                        | 1.00              |        |                 |
| Cardiac/aortic aneurysm repair/abdominal open surgery | 89 (64)              | 415 (22)             | 6.49 (3.89–10.85) | <0.001 | 1.949                  | 7.02 (4.04–12.19) | <0.001 | 4               |
| Laparoscopic abdominal                                | 12 (9)               | 219 (11)             | 1.66 (0.72–3.81)  | 0.432  | 0.551                  | 1.74 (0.74–4.09)  | 0.369  |                 |



Table 3. Cont.

| Variables    | Univariable analysis |                      |                  |       | Multivariable analysis |                  |       | Assigned points |
|--------------|----------------------|----------------------|------------------|-------|------------------------|------------------|-------|-----------------|
|              | With PPC (n=140)     | Without PPC (n=1919) | OR (95% CI)      | p     | Regression coefficient | OR (95% CI)      | p     |                 |
| Neurosurgery | 7 (5)                | 316 (16)             | 0.67 (0.24–1.84) | 1.000 | −0.268                 | 0.77 (0.25–2.30) | 1.000 |                 |

A multivariable analysis using a logistic regression model was conducted with backward step-wise selection with  $p < 0.05$  for inclusion of variables and  $p > 0.10$  for removal of variables from all variables used for Univariable analysis and only significant variables in a multivariable analysis were indicated in the table.

PPC, postoperative pulmonary complications; OR, odds ratio; CI, confidence interval; CHF, congestive heart failure; ASA, American Society of Anesthesiologists.

Hosmer-Lemeshow test,  $\chi^2 = 7.653$ ,  $p = 0.468$ .

doi:10.1371/journal.pone.0113656.t003

findings of previous studies, the cut-off value for albumin was considerably higher than that suggested in previous studies (albumin  $< 3.0$ – $3.5$  mg/dL) [5, 12]. Overall, the percentage of patients with albumin less than 3.0 g/dl was only 4.2%, which reflects the fact that the patients who underwent surgery had good nutritional status.

The incisions for chest and abdominal operations frequently damage the diaphragm and respiratory muscles, and postoperative pain provokes hypoventilation [13–15]. Compared to open surgery, the laparoscopic approach for abdominal surgery causes less postoperative pain, facilitating deep breathing and active coughing to prevent PPCs. Previous studies have shown that open abdominal surgery had a nearly twofold increased risk of postoperative complications compared to laparoscopic abdominal surgery [16, 17] and laparoscopic abdominal surgery offers improved postoperative lung function [18].

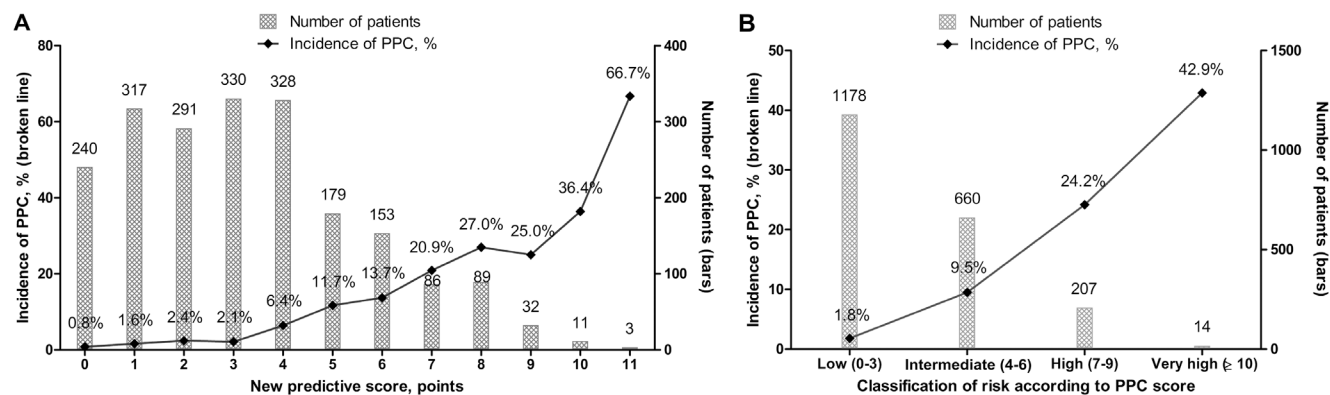

**Figure 2. The number of patients and the incidence of postoperative pulmonary complications (PPCs) by each point of the PPC scoring index (A) and by each risk class according to the PPC score (B).** PPC scores were calculated as follows: 1 point each for current smoker within 2 months, the presence of airflow limitation, American Society of Anesthesiologists  $\geq$  class 2, and serum albumin  $< 4.0$  g/dL; 2 points each for age  $\geq 70$  years and emergency operation; and 4 points for cardiac/aortic aneurysm repair/abdominal open surgery without a laparoscopic procedure. PPC risk was classified according to the PPC score as follows: low, 0–3 points; intermediate 4–6 points; high, 7–9 points; very high,  $\geq 10$  points. Each bar graph shows the number of patients with each score for the PPC scoring index. Each broken line shows the incidence of PPCs for each point on the PPC scoring index. PPCs, postoperative pulmonary complications.

doi:10.1371/journal.pone.0113656.g002

As such, for the first time, we evaluated laparoscopic abdominal surgery as a separate variable for PPCs. Our data showed that open abdominal surgery was an independent risk factor for PPCs, while laparoscopic abdominal surgery was not; confirming that opting for laparoscopic procedures is an important strategy to reduce the rate of PPCs.

Contrary to previous studies [19–21], we did not identify CHF as a significant risk factor for PPCs. As two of the three previous papers investigated only geriatric patients (age 70 and older), a history of CHF might be a major risk factor for selected patients of advanced age ( $\geq 70$  years) [20, 21]. A recent study, which had patients with median age of 60 years old and used a similar definition of PPCs to our study, also showed that CHF was not an independent risk factor [7]. However, since the patients with severe heart failure might be referred to cardiologists only, and not to respiratory physicians, selection bias might affect our results. Regarding obesity, our study was consistent with most reports that increased BMI was not a major factor for PPCs [10, 22, 23].

In our study, all variables were registered prospectively by specialists in respiratory medicine after examining the patients. In addition, all patients scheduled for surgery were advised to undergo perioperative strategies to prevent PPCs. Particularly, as incentive spirometry has been shown to correlate with a reduction in the incidence of respiratory infection, respiratory failure, and atelectasis and with lung function improvement [6, 24], it has been recommended that incentive spirometry be used routinely during the perioperative period in all patients undergoing general anesthesia.

There were several limitations to this study. First, there was its retrospective nature for evaluating the main outcome of PPCs. Second, there were 38,225 cases with non-pulmonary/non obstetric surgical operations during the period of this study. Since the consultations with respiratory physicians were at the discretion of the treating surgeons, 2,059 patients (5.4%) were included in our cohort. Thus, selection bias might have influenced our findings despite the use of prospectively registered data. Given that more than 75% of cohort patients were older than age of 60 years and 30% had the presence of airflow limitation, our cohort would reflect real world practice. Third, this study was from a single institution, a tertiary referral center, which might limit the generalizability of our findings. Finally, our scheme needs to be validated by prospective studies.

In conclusion, a new risk stratification system that comprises seven factors with weighted scores had good discriminative ability for predicting PPCs in our study cohort. Our findings raise the possibility of using new cut-off values for albumin and inclusion of laparoscopic procedures as a separate variable. Additional studies are required to validate this new prediction rule.

## Supporting Information

**Table S1. Cut points of the continuous variables in the logistic regression.**  
[doi:10.1371/journal.pone.0113656.s001](https://doi.org/10.1371/journal.pone.0113656.s001) (DOCX)

## Acknowledgments

The authors would like to thank Soohyun Kim and Haejung Kim for electronic medical record development for this study.

## Author Contributions

Conceived and designed the experiments: HYP B-HJ BS. Performed the experiments: JSE HY WS KJL. Analyzed the data: SW B-HJ. Contributed reagents/materials/analysis tools: SH KJ S-WU W-JK GYS MPC HK OJK. Wrote the paper: HYP B-HJ BS JSE KJ.

## References

1. Smetana GW (1999) Preoperative pulmonary evaluation. *N Engl J Med* 340: 937–944.
2. Fleischmann KE, Goldman L, Young B, Lee TH (2003) Association between cardiac and noncardiac complications in patients undergoing noncardiac surgery: outcomes and effects on length of stay. *Am J Med* 115: 515–520.
3. Fisher BW, Majumdar SR, McAlister FA (2002) Predicting pulmonary complications after nonthoracic surgery: a systematic review of blinded studies. *Am J Med* 112: 219–225.
4. Lee TH, Marcantonio ER, Mangione CM, Thomas EJ, Polanczyk CA, et al. (1999) Derivation and prospective validation of a simple index for prediction of cardiac risk of major noncardiac surgery. *Circulation* 100: 1043–1049.
5. Smetana GW, Lawrence VA, Cornell JE, American College of P (2006) Preoperative pulmonary risk stratification for noncardiothoracic surgery: systematic review for the American College of Physicians. *Ann Intern Med* 144: 581–595.
6. Qaseem A, Snow V, Fitterman N, Hornbake ER, Lawrence VA, et al. (2006) Risk assessment for and strategies to reduce perioperative pulmonary complications for patients undergoing noncardiothoracic surgery: a guideline from the American College of Physicians. *Ann Intern Med* 144: 575–580.
7. Canet J, Gallart L, Gomar C, Paluzie G, Valles J, et al. (2010) Prediction of postoperative pulmonary complications in a population-based surgical cohort. *Anesthesiology* 113: 1338–1350.
8. Restrepo RD, Wettstein R, Wittnebel L, Tracy M (2011) Incentive spirometry: 2011. *Respir Care* 56: 1600–1604.
9. Kingston HG, Hirshman CA (1984) Perioperative management of the patient with asthma. *Anesth Analg* 63: 844–855.
10. Nafiu OO, Kheterpal S, Moulding R, Picton P, Tremper KK, et al. (2011) The association of body mass index to postoperative outcomes in elderly vascular surgery patients: a reverse J-curve phenomenon. *Anesth Analg* 112: 23–29.
11. Moons KG, Harrell FE, Steyerberg EW (2002) Should scoring rules be based on odds ratios or regression coefficients? *J Clin Epidemiol* 55: 1054–1055.
12. Smetana GW (2009) Postoperative pulmonary complications: an update on risk assessment and reduction. *Cleve Clin J Med* 76 Suppl 4: S60–65.
13. Ford GT, Whitelaw WA, Rosenal TW, Cruse PJ, Guenter CA (1983) Diaphragm function after upper abdominal surgery in humans. *Am Rev Respir Dis* 127: 431–436.
14. Nimmo AF, Drummond GB (1996) Respiratory mechanics after abdominal surgery measured with continuous analysis of pressure, flow and volume signals. *Br J Anaesth* 77: 317–326.
15. Cashman JN, Dolin SJ (2004) Respiratory and haemodynamic effects of acute postoperative pain management: evidence from published data. *Br J Anaesth* 93: 212–223.

16. **Weller WE, Rosati C** (2008) Comparing outcomes of laparoscopic versus open bariatric surgery. *Ann Surg* 248: 10–15.
17. **Webb S, Rubinfeld I, Velanovich V, Horst HM, Reickert C** (2012) Using National Surgical Quality Improvement Program (NSQIP) data for risk adjustment to compare Clavien 4 and 5 complications in open and laparoscopic colectomy. *Surg Endosc* 26: 732–737.
18. **Frazer RC, Roberts JW, Okeson GC, Symmonds RE, Snyder SK, et al.** (1991) Open versus laparoscopic cholecystectomy. A comparison of postoperative pulmonary function. *Ann Surg* 213: 651–653; discussion 653–654.
19. **Arozullah AM, Daley J, Henderson WG, Khuri SF** (2000) Multifactorial risk index for predicting postoperative respiratory failure in men after major noncardiac surgery. The National Veterans Administration Surgical Quality Improvement Program. *Ann Surg* 232: 242–253.
20. **Leung JM, Dzankic S** (2001) Relative importance of preoperative health status versus intraoperative factors in predicting postoperative adverse outcomes in geriatric surgical patients. *J Am Geriatr Soc* 49: 1080–1085.
21. **Liu LL, Leung JM** (2000) Predicting adverse postoperative outcomes in patients aged 80 years or older. *J Am Geriatr Soc* 48: 405–412.
22. **Pasulka PS, Bistran BR, Benotti PN, Blackburn GL** (1986) The risks of surgery in obese patients. *Ann Intern Med* 104: 540–546.
23. **Dales RE, Dionne G, Leech JA, Lunau M, Schweitzer I** (1993) Preoperative prediction of pulmonary complications following thoracic surgery. *Chest* 104: 155–159.
24. **Kundra P, Vitheeswaran M, Nagappa M, Sistla S** (2010) Effect of preoperative and postoperative incentive spirometry on lung functions after laparoscopic cholecystectomy. *Surg Laparosc Endosc Percutan Tech* 20: 170–172.
